# Supplementary material for: Identification of sumoylation targets, combined with inactivation of SMT3, reveals the impact of sumoylation upon growth, morphology, and stress resistance in the pathogen Candida albicans
Source: PubMed Central journal article supplement — Mol Biol Cell. 2011 Mar 1;22(5):687–702. doi: 10.1091/mbc.E10-07-0632 (PMC3046064; doi:10.1091/mbc.e10-07-0632), 2011-03-01

## Summary of Supplementary Data

| Sheet | Title               | Description                                                                                         |
|-------|---------------------|-----------------------------------------------------------------------------------------------------|
| 1     | Summary             | Summary of Supplementary Data                                                                       |
| 2     | Sumoylation Targets | List of sumoylation targets in <i>C. albicans</i>                                                   |
| 3     | MET3p-SMT3 control  | Effects of stress upon <i>C. albicans</i> MET3p-SMT3/smt3 in the absence of methionine and cysteine |
| 4     | Primers             | List of PCR primers used in this study                                                              |
| 5     | Mutant confirmation | Confirmation of genomic SDM of sumoylation sites by PCR                                             |

List of sumoylation targets in *C. albicans*

| Sample Ref                                                                      | Accession Number (CandidaDB) | Accession Number (CGD) | Protein Name | Mol. Wt. (Da) | pI   | Mascot Score | Peptides Matched | Sequence Coverage | ELDP | Function                                                                               | Sumoylated in <i>S. cerevisiae</i> ? | Predicted Sumoylation Site                                                             | Sumoylation detected in absence of stress? | Sumoylation upregulated in response to stress? | Sample gel used for spot cutting |
|---------------------------------------------------------------------------------|------------------------------|------------------------|--------------|---------------|------|--------------|------------------|-------------------|------|----------------------------------------------------------------------------------------|--------------------------------------|----------------------------------------------------------------------------------------|--------------------------------------------|------------------------------------------------|----------------------------------|
| <b>Constitutively sumoylated</b>                                                |                              |                        |              |               |      |              |                  |                   |      |                                                                                        |                                      |                                                                                        |                                            |                                                |                                  |
| 1 (1)                                                                           | CA5549                       | orf19.7312             | ERG13        | 49952         | 5.67 | 1086         | 24               | 63%               | 14   | Ergosterol Biosynthesis                                                                | Yes                                  | Type: Ψ-K-X-E Position 311                                                             | Yes                                        | No                                             | NS                               |
| 8 (10)                                                                          | CA0585                       | orf19.5061             | ADE5,7       | 86120         | 5.14 | 654          | 25               | 43%               | 15   | Enzyme of adenine biosynthesis                                                         | No                                   | Type: Ψ-K-X-E Position 107                                                             | Yes                                        | No                                             | O                                |
| 9 (11)                                                                          | CA4672                       | orf19.900              | NSP1         | 74656         | 5.15 | 288          | 13               | 28%               | 11   | Essential component of the nuclear pore complex                                        | No                                   | TypeII: Non-consensus position 421, 672, 715 (medium)                                  | Yes                                        | No                                             | O                                |
| 9 (11)                                                                          | CA1911                       | orf19.2435             | SSE1 (MSI3)  | 78818         | 5.2  | 48           | 5                | 11%               | 5    | Protein of the HSP70 family                                                            | Yes                                  | TypeI: Non-consensus position 94, 393, 610, 630 and TypeII: Non-consensus position 681 | Yes                                        | No                                             | O                                |
| 30 (28)                                                                         | CA3534                       | orf19.6367             | SSB1         | 66580         | 5.25 | 561          | 15               | 35%               | 7    | Putative HSP70 family heat shock protein                                               | Yes                                  | Type: Ψ-K-X-E Position 245                                                             | Yes                                        | No                                             | H                                |
| 30 (28)                                                                         | CA2480                       | orf19.3206             | CCT7         | 61011         | 5.15 | 154          | 8                | 18%               | 8    | cytosolic chaperonin Cct ring complex, required for the assembly of actin and tubulins | No                                   | Type: Ψ-K-X-E Position 254 and 478                                                     | Yes                                        | No                                             | H                                |
| 34 (8)                                                                          | CA5920                       | orf19.6785             | RPS12        | 15973         | 4.63 | 1140         | 10               | 62%               | 4    | Putative ribosomal protein                                                             | No                                   | TypeII: Non-consensus position 54                                                      | Yes                                        | No                                             | O                                |
| 34 (8)                                                                          | CA6058                       | orf19.7678             | ATP16        | 17571         | 5.15 | 291          | 6                | 47%               | 2    | subunit of the mitochondrial F1F0 ATP synthase                                         | No                                   | TypeII: Non-consensus position 115 (low)                                               | Yes                                        | No                                             | O                                |
| 34 (8)                                                                          | CA2454                       | orf19.3504             | RPL23A       | 13199         | 10.1 | 201          | 6                | 47%               | 6    | Putative ribosomal protein                                                             | No                                   | Type: Ψ-K-X-E Position 245                                                             | Yes                                        | No                                             | O                                |
| 34 (8)                                                                          | CA3045                       | orf19.2416.1           | MLC1         | 15899         | 4.64 | 133          | 3                | 25%               | 3    | Protein with microtubule-dependent localization to the Spitzenkorper                   | No                                   | No sites predicted                                                                     | Yes                                        | No                                             | O                                |
| <b>Increased sumoylation in response to heat</b>                                |                              |                        |              |               |      |              |                  |                   |      |                                                                                        |                                      |                                                                                        |                                            |                                                |                                  |
| 22 (3)                                                                          | CA3730                       | orf19.4180             | SEC72        | 23411         | 5.01 | 553          | 17               | 63%               | 9    | Component of ER protein-translocation complex                                          | ND (Not detected)                    | Type: Ψ-K-X-E Position 31 and 103                                                      | Yes                                        | Heat                                           | H                                |
| <b>Increased sumoylation in response to H<sub>2</sub>O<sub>2</sub></b>          |                              |                        |              |               |      |              |                  |                   |      |                                                                                        |                                      |                                                                                        |                                            |                                                |                                  |
| 6 (2)                                                                           | CA0685                       | orf19.5591             | ADO1         | 38345         | 5.04 | 294          | 13               | 58%               | 11   | Adenosine kinase                                                                       | No                                   | Type: Ψ-K-X-E Position 19                                                              | No                                         | H2O2                                           | O                                |
| 6 (2)                                                                           | CA0622                       | orf19.3149             | LSP1         | 35569         | 4.89 | 233          | 8                | 34%               | 8    | Component of eisosomes, associated with endocytosis                                    | No                                   | Type: Ψ-K-X-E Position 63                                                              | No                                         | H2O2                                           | O                                |
| 6 (2)                                                                           | CA1024                       | orf19.3934             | CAR1         | 34649         | 4.88 | 143          | 6                | 29%               | 4    | Arginine degradation                                                                   | No                                   | TypeII: Non-consensus position 13, 56 and 178 (low)                                    | No                                         | H2O2                                           | O                                |
| 6 (2)                                                                           | CA5773                       | orf19.5417             | DOT5         | 29177         | 4.69 | 97           | 3                | 17%               | 3    | Nuclear thiol peroxidase                                                               | No                                   | Type: Ψ-K-X-E Position 208 and TypeII: Non-consensus position 204                      | No                                         | H2O2                                           | O                                |
| 6 (2)                                                                           | CA2582                       | orf19.4371             | TAL1         | 35661         | 4.63 | 72           | 6                | 25%               | 6    | Transaldolase                                                                          | Yes                                  | Type: Ψ-K-X-E Position 271                                                             | No                                         | H2O2                                           | O                                |
| 7 (5)                                                                           | CA0870                       | orf19.3590             | IPP1         | 32336         | 5.15 | 1299         | 18               | 67%               | 10   | Putative inorganic pyrophosphatase                                                     | Yes                                  | Type: Ψ-K-X-E Position 271 and 233                                                     | No                                         | H2O2                                           | O                                |
| 7 (5)                                                                           | CA0784                       | orf19.3930             | YUH2         | 33859         | 5.28 | 75           | 2                | 10%               | 2    | Ubiquitin C-terminal hydrolase                                                         | No                                   | Type: Ψ-K-X-E Position 261 and TypeII: Non-consensus position 311                      | No                                         | H2O2                                           | O                                |
| 10 (12)                                                                         | CA1239                       | orf19.717              | HSP60        | 60374         | 5.22 | 2034         | 37               | 72%               | 21   | Mitochondrial HS protein                                                               | Yes                                  | Type: Ψ-K-X-E Position 324                                                             | No                                         | H2O2                                           | O                                |
| 12 (14)                                                                         | CA4139                       | orf19.4233             | THR4         | 57723         | 5.18 | 1131         | 31               | 67%               | 17   | Threonine synthase                                                                     | No                                   | Type: Ψ-K-X-E Position 505                                                             | No                                         | H2O2                                           | O                                |
| <b>Increased sumoylation in response to heat and H<sub>2</sub>O<sub>2</sub></b> |                              |                        |              |               |      |              |                  |                   |      |                                                                                        |                                      |                                                                                        |                                            |                                                |                                  |

|         |        |            |          |        |      |      |    |     |    |                                                          |     |                                                                    |    |               |   |
|---------|--------|------------|----------|--------|------|------|----|-----|----|----------------------------------------------------------|-----|--------------------------------------------------------------------|----|---------------|---|
| 11 (13) | CA2474 | orf19.2877 | PDC11    | 62744  | 5.39 | 2129 | 32 | 71% | 26 | Pyruvate decarboxylase                                   | Yes | Typell: Non-consensus position 177, 271 and 275 (medium)           | No | Heat and H2O2 | O |
| 11 (13) | CA4875 | orf19.6561 | LAT1     | 50145  | 5.73 | 267  | 7  | 20% | 7  | Component of pyruvate dehydrogenase complex              | No  | Typel: Ψ-K-X-E Position 153 and Typell: Non-consensus position 154 | No | Heat and H2O2 | O |
| 33 (7)  | CA4474 | orf19.1896 | SSC1     | 69876  | 5.48 | 2342 | 36 | 62% | 16 | Heat shock protein                                       | Yes | Typel: Ψ-K-X-E Position 269 and 294                                | No | Heat and H2O2 | O |
| 33 (7)  | CA3534 | orf19.6367 | SSB1     | 66580  | 5.25 | 670  | 14 | 31% | 10 | Putative HSP70 family heat shock protein                 | Yes | Typel: Ψ-K-X-E Position 245                                        | No | Heat and H2O2 | O |
| 33 (7)  | CA0838 | orf19.1680 | TFP1     | 63060  | 5.24 | 83   | 6  | 12% | 4  | Subunit of vacuolar H <sup>+</sup> -ATPase               | No  | Typel: Ψ-K-X-E Position 117                                        | No | Heat and H2O2 | O |
| 35 (9)  | CA2239 | orf19.3915 | IPF10029 | 48029  | 5.05 | 484  | 14 | 44% | 10 | Putative Cys-Gly dipeptidase involved in GSH degradation | No  | Typel: Ψ-K-X-E Position 71 and 336                                 | No | Heat and H2O2 | O |
| 35 (9)  | CA4456 | orf19.6854 | ATP1     | 52881  | 8.49 | 200  | 11 | 27% | 11 | Protein similar to ATP synthase alpha subunit            | No  | Typell: Non-consensus position 170, 419, 529 (medium)              | No | Heat and H2O2 | O |
| 35 (9)  | CA5546 | orf19.7308 | TUB1     | 50162  | 4.98 | 61   | 6  | 20% | 6  | Alpha-tubulin                                            | Yes | Typell: Non-consensus position 97, 305, 337, 340 (low)             | No | Heat and H2O2 | O |
| 35 (9)  | CA4331 | orf19.4089 | SGT1     | 47368  | 4.92 | 52   | 1  | 3%  | 1  | Co-chaperone protein involved in kinetochore assembly    | No  | Typel: Ψ-K-X-E Position 119 and 245                                | No | Heat and H2O2 | O |
| 23 (4)  | CA5135 | orf19.6389 | HSP104   | 100171 | 5.42 | 929  | 41 | 50% | 31 | Functional homolog of <i>S. cerevisiae</i> Hsp104p       | No  | Typel: Ψ-K-X-E Position 356                                        | No | Heat and H2O2 | H |
| 23 (4)  | CA0958 | orf19.4732 | SEC24    | 102683 | 5.26 | 554  | 21 | 29% | 17 | ER to Golgi transport                                    | No  | Typel: Ψ-K-X-E Position 214                                        | No | Heat and H2O2 | H |

Effects of stress upon *C. albicans* *MET3p-SMT3/smt3* in the absence of methionine and cysteine

NO Met/Cys control

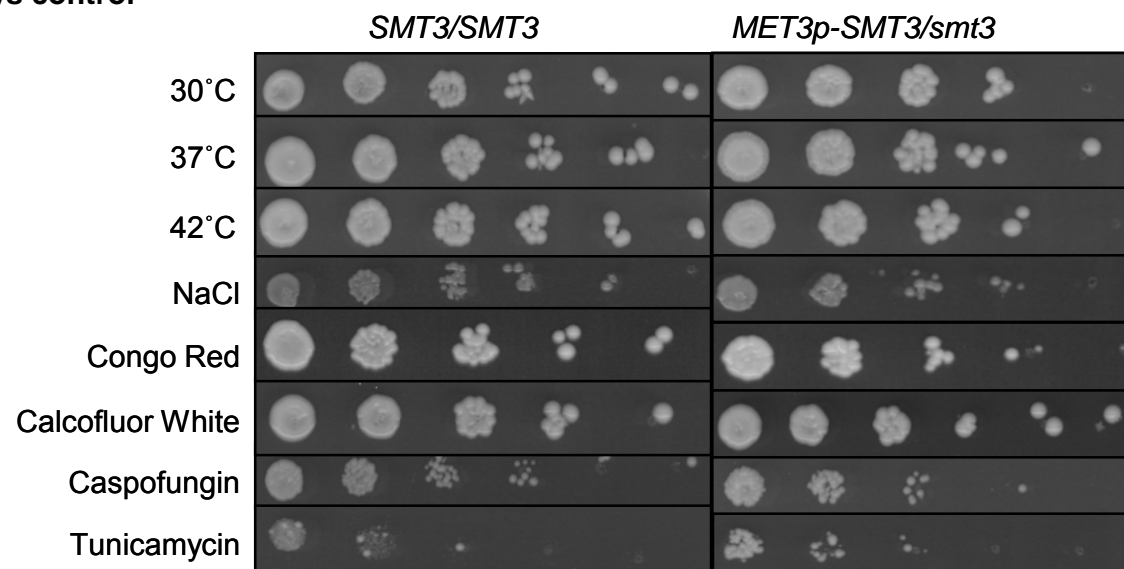

PLUS Met/Cys (Figure 4B)

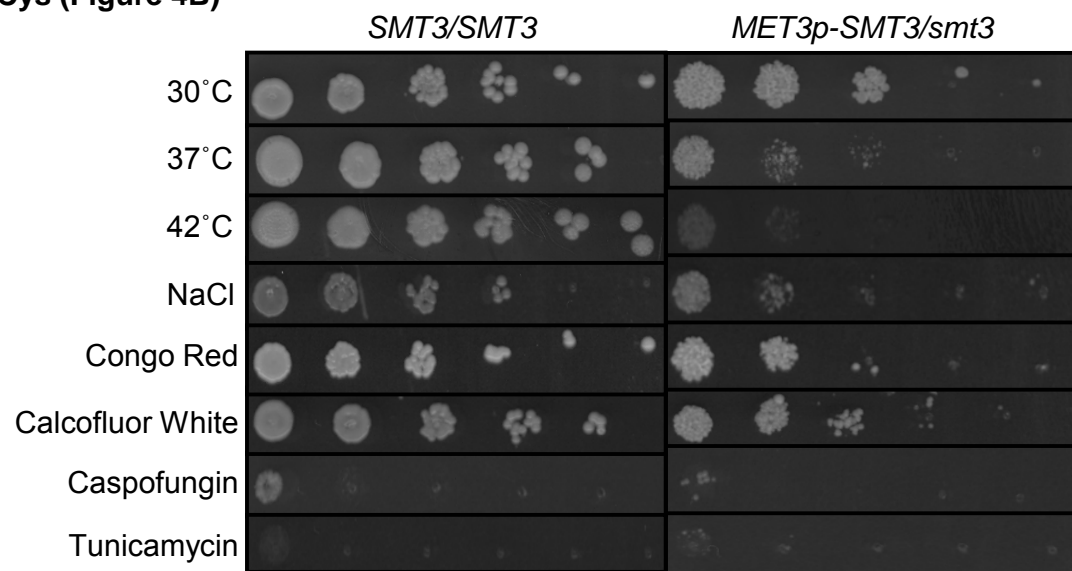

## Oligonucleotides used in this study

| Primer   | Sequence (5' to 3')                                                                                                                        | Application                                                                            |
|----------|--------------------------------------------------------------------------------------------------------------------------------------------|----------------------------------------------------------------------------------------|
| SMT3d-F  | GCAAGATAGCATATTTGTTTC                                                                                                                      | Diagnosis of <i>SMT3</i> , <i>ARG4</i> and <i>URA3</i> alleles                         |
| SMT3d2-F | GCACCAGGTTATCATAAGGA                                                                                                                       | Diagnosis of <i>SMT3</i> allele                                                        |
| SMT3d-R  | CGCATAGTATCGGGAGATG                                                                                                                        | Diagnosis of <i>SMT3</i> and <i>URA3-MET3-SMT3</i> alleles                             |
| SMT3d2-R | GGCCGCAAATGAGATTTGGTAACA                                                                                                                   | Diagnosis of <i>SMT3</i> , <i>ARG4</i> , <i>URA3</i> and <i>URA3-MET3-SMT3</i> alleles |
| MET3p-F  | ATTGCTGTGGATCACGTGC                                                                                                                        | Diagnosis of <i>URA3-MET3-SMT3</i> allele                                              |
| LALd-R   | GCCCATCTAATAGGTTGAGC                                                                                                                       | Diagnosis of <i>smt3::ARG4</i> allele                                                  |
| LULd-R   | GTATGGGGTTGTTGCTCAGG                                                                                                                       | Diagnosis of <i>smt3::URA3</i> allele                                                  |
| MetUS-F  | CGATTCTAATCAACAGAGGTTCTGTTGTATCAGAAAGACATGAAAACA<br>AGGTCGTGCAGCATACACAATTGTGGTGGTGGCCGGCCGACTTGGCCA<br>AGCCTAGATC                         | Amplification of <i>URA3-MET3-SMT3</i> cassette                                        |
| MetUS-R  | ATGTCCGACACTGAAAACACAGGAGGCTCACCACCAGCTGCTGAAGCA<br>GGTCCAAAAGAAGAAAAAGGAACACATATAAATGTGGGGAGGGTATTT<br>ACTTTTAAATA                        | Amplification of <i>URA3-MET3-SMT3</i> cassette                                        |
| LAL-F    | GGTGGTGGTCTGAACCAACGCGACTGAAGAAACAAGAAATACGCCAC<br>CAGACAACAACAACAATTCTATTATTTTTTCTGTTGTTCTTCATTACCC<br>CAGGGTTTTCCCAGTCACG                | Amplification of <i>smt3::ARG4</i> cassette                                            |
| LAL-R    | CCGTTCAACATTAACAAAGACTACTATTCAACATAAACCAGCAATACC<br>TTGCCTCTACAATCTTGAATTAAGAATACAATTACCTCCATTAAGTAC<br>ACTAAAGGGAACAAAAGC                 | Amplification of <i>smt3::ARG4</i> cassette                                            |
| LUL-F    | GGTTATCATAAGGACATTTTATATTTCTAGCAAAGAATTACTTGAAACAC<br>TGTTGAAACATCAATGAAACGATCATTACTTTTTCAGCCACTTAAACACA<br>TTCTACTACGCCAGGGTTTTCCCAGTCACG | Amplification of <i>smt3::URA3</i> cassette                                            |
| LUL-R    | GGTCCTATATAGACAACCTTTTTGGAGAGTATAGCATAATAGCATCGGT<br>TTAGTGATTAATTTTGTAAACCATTGAATATTCTATGTAAATAATGTTAC<br>CAAATCTCACTAAAGGGAACAAAAGC      | Amplification of <i>smt3::URA3</i> cassette                                            |
| SMT3FL-F | AAGGTGGTTTAAAGCTTAATGTCCGACACTGAAAACACAGGAGGCTCAC                                                                                          | Amplification of <i>SMT3</i> for FLAG tagging                                          |
| SMT3FL-R | AAATAGGGACGCTAGCTTATAACAACCACCAATTTGTGCACGGTGAG                                                                                            | Amplification of <i>SMT3</i> for FLAG tagging                                          |
| SMT3S-F  | CAGTCACAACACTACATACTCG                                                                                                                     | Amplification of <i>SMT3</i> probe for Southern analysis                               |
| SMT3S-R  | CGACTTTTCGTGCTCAAGAG                                                                                                                       | Amplification of <i>SMT3</i> probe for Southern analysis                               |
| LALS-F   | GGTAGATCAAGAAATGATC                                                                                                                        | Amplification of <i>ARG4</i> probe for Southern analysis                               |
| LALS-R   | CAATCAGTAAAGTAGAAATC                                                                                                                       | Amplification of <i>ARG4</i> probe for Southern analysis                               |
| LULS-F   | CCTATAGTGAGAGAGCAG                                                                                                                         | Amplification of <i>URA3</i> probe for Southern analysis                               |
| LULS-R   | GGATCTCTTCCTTTACC                                                                                                                          | Amplification of <i>URA3</i> probe for Southern analysis                               |

|                        |                                                                                                                                                                                                        |                                                             |
|------------------------|--------------------------------------------------------------------------------------------------------------------------------------------------------------------------------------------------------|-------------------------------------------------------------|
| FLAG-F                 | AGCTACGGATCCACCATGGATTACAAAGATGATGATGATAAAGGTGGT<br>GATTACAAAGATGATGATGATAAAGGTGGTGGTATTACAAAGATGAT<br>GATGATAAAGGTGGTTTA                                                                              | Cloning of FLAG tag                                         |
| FLAG-R                 | AGCTTAAACCACCTTTATCATCATCATCTTTGTAATCACCACCACCTTTA<br>TCATCATCATCTTTGTAATCACCACCTTTATCATCATCATCTTTGTAATC<br>CATGGTGGATCCGT                                                                             | Cloning of FLAG tag                                         |
| ACT1-F                 | ACCACCGGTATTGTTTTGGA                                                                                                                                                                                   | Real time RT-PCR of <i>ACT1</i> transcript levels           |
| ACT1-R                 | AGCGTAAATTGGAACAACGTG<br>ACCACCGGTATTGTTTTGGATTCTGGTGATGGTGTTACTCACGTTGTT                                                                                                                              | Real time RT-PCR of <i>ACT1</i> transcript levels           |
| ACT1-P                 | CCAATTTACGCT                                                                                                                                                                                           | Probe for real time RT-PCR of <i>ACT1</i> transcript levels |
| SMT3q-F                | CTCCCGATACTATGCGTTTCTT                                                                                                                                                                                 | Real time RT-PCR of <i>SMT3</i> transcript levels           |
| SMT3q-R                | CTGGTGTTTGATCAGCATGAA<br>CTCCCGATACTATGCGTTTCTTAGTTGATGGTGGAAGAGTTCATGCTG                                                                                                                              | Real time RT-PCR of <i>SMT3</i> transcript levels           |
| SMT3q-P                | ATCAAACACCAG                                                                                                                                                                                           | Probe for real time RT-PCR of <i>SMT3</i> transcript levels |
| HSP104-F               | CCCTTCCCTAAATCCTCAAGTC                                                                                                                                                                                 | Amplification of <i>HSP104</i>                              |
| HSP104-R               | GGTTTATCCATTGAGCCAGAATC<br>TATCGAATTCACGCGTCACTATTAGATCATGGAAGATTTTACAGATAAC                                                                                                                           | Amplification of <i>HSP104</i>                              |
| HSP104-CTF             | GCTATCAAG<br>TCCAGGTACCGGATCCTTAGTCAAGTCCAGGTGAAGTGAATCTGGCTT                                                                                                                                          | Cloning of <i>HSP104</i>                                    |
| HSP104-CTR             | CG<br>CCACCCTTCCCTAAATCCTCAAGTCTTTTTCATTTCTTTTTTTCTTTT<br>TTTTTTCAACTTCAATTCATTATTAATAACAATTATACACTATTAGATCCC                                                                                          | Amplification of <i>hsp104::ARG4</i> cassette               |
| HSP104-LAL-F           | AGGGTTTTCCAGTCACG<br>GCATCTAGTTCCTTTACGCTTTTTTCTAATTATTAACAGAATGATGGTTT<br>ATCCATTGAGCCAGAATCTTATATATACACAAAACAAGTTCCACTAAAG                                                                           | Amplification of <i>hsp104::ARG4</i> cassette               |
| HSP104-LAL-R           | GGAACAAAAGC<br>GTTCAATTTCCAAAGATGGTGCATTTGAAAGAAGATTCCAAAAAATCGAT<br>GTTCCCTGCCGCCACCGTGCAAGAACTGTGCCATTTTTAAGAGGTATC                                                                                  | Amplification of Clp20- <i>HSP104</i> (HIS1)                |
| HSP104-WT-F            | CAGCCT <b>AAAT</b> ATGAAATTCACCATGGGGTCCG<br>GTTCAATTTCCAAAGATGGTGCATTTGAAAGAAGATTCCAAAAAATCGAT                                                                                                        | Amplification of Clp20- <i>HSP104</i> changing K356R (HIS1) |
| HSP104-SDM-<br>K356R-F | GTTCCCTGCCGCCACCGTGCAAGAACTGTGCCATTTTTAAGAGGTATC<br>CAGCCT <b>CGAT</b> ATGAAATTCACCATGGGGTCCG<br>GCCTAGCTAGCTCAATCGGCTTAGAGCGTGAGACTTTTTAATCTCAAGG<br>TTGCGGGTTCGAGTCCCGCGTTGGGCTTATATTTTTGCATCTAGTTCC | Amplification of Clp20- <i>HSP104</i> (HIS1)                |
| HSP104-SDM-R           | TTTACGCACTAGTGATTGGTCTGGTGCTAGC                                                                                                                                                                        |                                                             |
| HSP104d-F              | GGAACCAACTAGAGTGACTC                                                                                                                                                                                   | Diagnosis of <i>HSP104</i> alleles                          |
| HSP104-WTd-F           | CATTTTTAAGAGGTATCCAGCCTAA                                                                                                                                                                              | Diagnosis of Clp20- <i>HSP104</i> (HIS1) allele             |
| HSP104-SDMd-F          | CATTTTTAAGAGGTATCCAGCCTCG                                                                                                                                                                              | Diagnosis of Clp20- <i>HSP104</i> K356R (HIS1) allele       |
| HSP104d-R              | GTAGTTACACAAGACATATTCC                                                                                                                                                                                 | Diagnosis of Clp20- <i>HSP104</i> [K356R] (HIS1) allele     |
| HSP60-F                | CACCAACACTTTAGTAGCATTAG                                                                                                                                                                                | Amplification of <i>HSP60</i>                               |

|                       |                                                                                                                                                                                                      |                                                                         |
|-----------------------|------------------------------------------------------------------------------------------------------------------------------------------------------------------------------------------------------|-------------------------------------------------------------------------|
| HSP60-R               | CTTTAGTAAACTTCTCACAGTGG<br>CGGTATCGATAAGCTTTAGCATTAGAATATCATGTTGAGAGTTAATTCT                                                                                                                         | Amplification of <i>HSP60</i><br>Cloning of <i>HSP60</i>                |
| HSP60-CTF             | AAATCATC                                                                                                                                                                                             |                                                                         |
| HSP60-CTR             | GTTACCACCACGCGTGAACATACCTGGCATACTCCCATACCTGG<br>GGGTGGGTCTCTCTCACTGTTGTGTAATTCGTACCAACAATTCCGGAA<br>CCAAGTTTCTCTACCAAATAAATACCCTCTTTTGTTCCTCCCTCCACC                                                 | Cloning of <i>HSP60</i><br>Amplification of <i>hsp60::ARG4</i> cassette |
| HSP60-LAL-F           | CAGGGTTTTCCCAGTCACG<br>CACAAACAATAACACCAACACCAACACCAACGTATAAATACAGCAATGC<br>TTTAGTAAACTTCTCACAGTGAATTAGACTAGGCAACCTCAGC ACTAA                                                                        | Amplification of <i>hsp60::ARG4</i> cassette                            |
| HSP60-LAL-R           | AGGGAACAAAAGC<br>GTGCTGTAAAGCTCCAGGTTTTGGTGACAATAGAAAAAACACTTTGG<br>GTGATATTGCCATTTTAAGTGGTGGTACTGTATTCACTGAAGAATTGGA                                                                                | Amplification of Clp20- <i>HSP60</i> (HIS1)                             |
| HSP60-WT-F            | TATT <b>AA</b> ACCAGAAAATGCCACTATTGAAC<br>GTGCTGTAAAGCTCCAGGTTTTGGTGACAATAGAAAAAACACTTTGG                                                                                                            | Amplification of Clp20- <i>HSP60</i> changing K324R (HIS1)              |
| HSP60-SDM-<br>K324R-F | GTGATATTGCCATTTTAAGTGGTGGTACTGTATTCACTGAAGAATTGGA<br>TATT <b>CG</b> ACCAGAAAATGCCACTATTGAAC<br>CACAAACAATAACACCAACACCAACACCAACGTATAAATACAGCAATGC<br>TTTAGTAAACTTCTCACAGTGAATTAGACTAGGCAACCTCAGCACTAG | Amplification of Clp20- <i>HSP60</i> (HIS1)                             |
| HSP60-SDM-R           | TGATTGGTCTGGTGCTAGC                                                                                                                                                                                  |                                                                         |
| HSP60d-F              | CAAATATGTATGTGAGAGAGACGG                                                                                                                                                                             | Diagnosis of <i>HSP60</i> alleles                                       |
| HSP60-WTd-F           | GTATTCCTGAAGAATTGGATATTAA                                                                                                                                                                            | Diagnosis of Clp20- <i>HSP60</i> (HIS1) allele                          |
| HSP60-SDMd-F          | TCACTGAAGAATTGGATATTCC                                                                                                                                                                               | Diagnosis of Clp20- <i>HSP60</i> K324R (HIS1) allele                    |
| HSP60d-R              | GTAGTTACACAAGACATATTCC                                                                                                                                                                               | Diagnosis of Clp20- <i>HSP60</i> [K324R] (HIS1) allele                  |

# Confirmation of genomic SDM of sumoylation sites by PCR

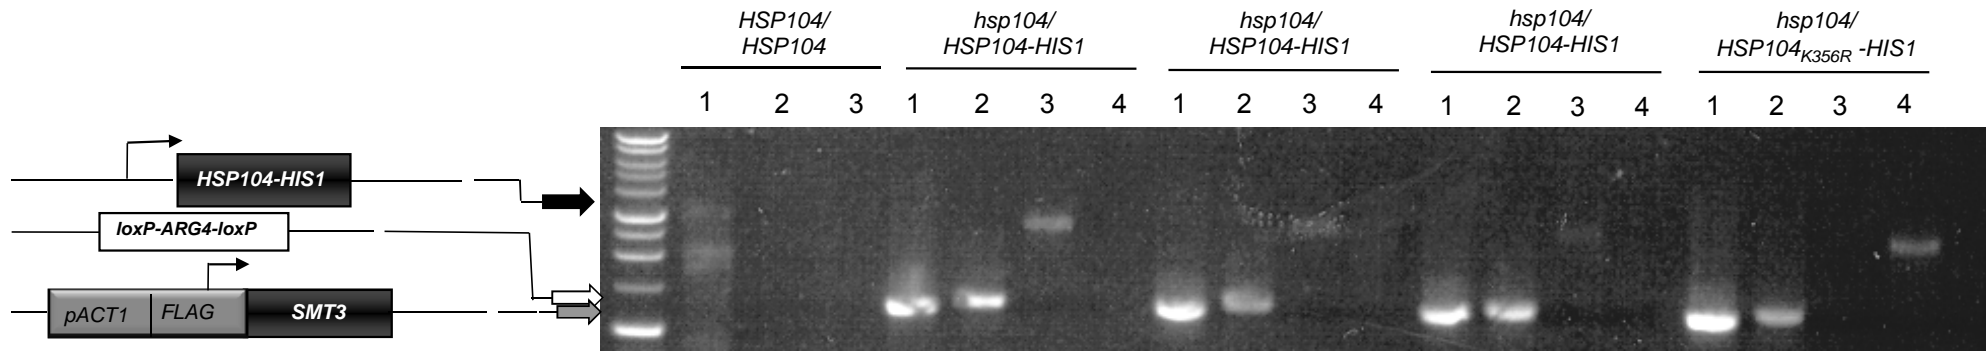

Supplement: E10-07-0632_1.pdf [file E10-07-0632_1.pdf]
